# Supplementary material for: Green polymer chemistry: synthesis of symmetric and asymmetric telechelic ethylene glycol oligomers
Source: Royal Society of Chemistry journal article supplement (doi:10.1039/c4py01223b), 2014-11-18
Supplement: c4py01223b1.pdf [file c4py01223b1.pdf]

Table 1. Effect of DVA/TEG molar ratio on the oligomerization of TEG

|                                              |                 | Composition (%)     |            |          |
|----------------------------------------------|-----------------|---------------------|------------|----------|
|                                              |                 | DVA/TEG molar ratio |            |          |
|                                              |                 | 1                   | 1.5        | 3.0      |
| <b>VO</b><br>Vinyl-[TEG] <sub>n</sub> -OH    | V-TEG-OH, n=1   | 0                   | -          | -        |
|                                              | Dimer, n=2      | 0                   | -          | -        |
|                                              | Trimer, n=3     | 6.11                | -          | -        |
|                                              | Tetramer, n=4   | 7.89                | -          | -        |
|                                              | Pentamer, n=5   | 7.62                | -          | -        |
|                                              | Hexamer, n=6    | 5.72                | -          | -        |
|                                              | Heptamer, n=7   | 3.98                | -          | -        |
|                                              | Octamer, n=8    | 2.61                | -          | -        |
|                                              | Nonamer, n=9    | 1.31                | -          | -        |
|                                              | Decamer, n=10   | 0.53                | -          | -        |
|                                              | Undecamer, n=11 | 0.36                | -          | -        |
|                                              | <b>Total</b>    | <b>36.13</b>        | <b>0</b>   | <b>0</b> |
| <b>OO</b><br>HO-[TEG] <sub>n</sub> -OH       |                 | Not detected        |            |          |
| <b>VV</b><br>Vinyl-[TEG] <sub>n</sub> -Vinyl | V-TEG-V, n=1    | 0                   | 0          | 0        |
|                                              | Dimer, n=2      | 0                   | 0          | 38.61    |
|                                              | Trimer, n=3     | 14.20               | 37.59      | 28.3     |
|                                              | Tetramer, n=4   | 14.29               | 27.57      | 18.89    |
|                                              | Pentamer, n=5   | 12.55               | 14.29      | 9.17     |
|                                              | Hexamer, n=6    | 9.70                | 9.02       | 3.3      |
|                                              | Heptamer, n=7   | 6.49                | 5.76       | 0.8      |
|                                              | Octamer, n=8    | 2.08                | 3.51       | -        |
|                                              | Nonamer, n=9    | 2.40                | 1.75       | -        |
|                                              | Decamer, n=10   | 1.47                | 0.50       | -        |
|                                              | Undecamer, n=11 | 0.43                | -          | -        |
|                                              | Dodecamer, n=12 | 0.17                | -          | -        |
| <b>Total</b>                                 | <b>63.88</b>    | <b>100</b>          | <b>100</b> |          |
| <b>Grand total</b>                           | <b>100</b>      | <b>100</b>          | <b>100</b> |          |
| $M_n$ (g/mol)                                | 1707.9          | 1248.6              | 738.07     |          |
| $\bar{D}_m$                                  | 1.11            | 1.14                | 1.24       |          |

WCALB = 170 mg<sub>1.0 eq.</sub>, 85.5mg<sub>1.5 eq.</sub>, 84 mg<sub>3.0 eq.</sub> [CALB] =  $2.77 \times 10^{-4}$  mol/L<sub>1.0 eq.</sub>,  $2.19 \times 10^{-4}$  mol/L<sub>1.5 eq.</sub>,  $1.35 \times 10^{-4}$  mol/L<sub>3.0 eq.</sub>, 30 minutes

Composition was calculated from MALDI-ToF mass spectrometry: Composition(%)=peak intensity/total peak intensity.

Table 2. Kinetics of the DVA-TEG reaction at DVA/TEG = 1.

| DVA/TEG = 1/1                                |                 | Composition (%) |              |              |              |              |              |
|----------------------------------------------|-----------------|-----------------|--------------|--------------|--------------|--------------|--------------|
|                                              |                 | Time (min)      |              |              |              |              |              |
|                                              |                 | 5.0             | 10           | 15           | 20           | 25           | 30           |
| <b>VO</b><br>Vinyl-[TEG] <sub>n</sub> -OH    | V-TEG-OH n = 1  | 0               | 0            | 0            | 0            | 0            | 0            |
|                                              | Dimer, n=2      | 5.86            | 7.45         | 5.57         | 2.55         | 3.68         | 0            |
|                                              | Trimer, n=3     | 8.56            | 12.38        | 10.68        | 9.18         | 10.29        | 6.11         |
|                                              | Tetramer, n=4   | 8.26            | 9.42         | 10.57        | 7.14         | 10.66        | 7.89         |
|                                              | Pentamer, n=5   | 4.35            | 6.33         | 6.7          | 3.57         | 6.25         | 7.62         |
|                                              | Hexamer, n=6    | 3               | 3.66         | 3.98         | 3.06         | 3.68         | 5.72         |
|                                              | Heptamer, n=7   | 1.65            | 2.11         | 2.16         | 1.02         | 2.57         | 3.98         |
|                                              | Octamer, n=8    | 0.9             | 1.27         | 1.25         | 0.51         | 1.84         | 2.61         |
|                                              | Nonamer, n=9    | 0.3             | 0.56         | 0.8          | 0.51         | 0.74         | 1.31         |
|                                              | Decamer, n=10   | 0.15            | 0.28         | 0.23         | -            | 0.74         | 0.53         |
|                                              | Undecamer, n=11 | -               | -            | -            | -            | -            | 0.36         |
|                                              | <b>Total</b>    | <b>33.03</b>    | <b>43.46</b> | <b>41.94</b> | <b>27.54</b> | <b>40.45</b> | <b>36.13</b> |
| <b>OO</b><br>HO-[TEG] <sub>n</sub> -OH       |                 | Not detected    |              |              |              |              |              |
| <b>VV</b><br>Vinyl-[TEG] <sub>n</sub> -Vinyl | V-TEG-V, n=1    | 10.06           | 7.74         | 5.68         | 3.57         | 2.57         | 0            |
|                                              | Dimer, n=2      | 16.82           | 14.91        | 16.25        | 17.86        | 12.5         | 0            |
|                                              | Trimer, n=3     | 16.52           | 15.19        | 17.16        | 21.43        | 19.12        | 14.2         |
|                                              | Tetramer, n=4   | 9.76            | 9.14         | 9.32         | 13.78        | 11.03        | 14.29        |
|                                              | Pentamer, n=5   | 6.16            | 4.78         | 5            | 7.65         | 6.99         | 12.55        |
|                                              | Hexamer, n=6    | 3.9             | 2.39         | 2.61         | 4.08         | 3.68         | 9.7          |
|                                              | Heptamer, n=7   | 2.55            | 1.41         | 1.25         | 2.55         | 2.21         | 6.49         |
|                                              | Octamer, n=8    | 0.75            | 0.7          | 0.57         | 1.02         | 1.1          | 2.08         |
|                                              | Nonamer, n=9    | 0.30            | 0.28         | 0.23         | 0.51         | 0.37         | 2.4          |
|                                              | Decamer, n=10   | 0.15            | -            | -            | -            | -            | 1.47         |
|                                              | Undecamer, n=11 | -               | -            | -            | -            | -            | 0.43         |
|                                              | Dodecamer, n=12 | -               | -            | -            | -            | -            | 0.17         |
| <b>Total</b>                                 | <b>66.97</b>    | <b>56.54</b>    | <b>58.07</b> | <b>72.45</b> | <b>59.57</b> | <b>63.88</b> |              |
| <b>Grand total</b>                           | <b>100</b>      | <b>100</b>      | <b>100</b>   | <b>100</b>   | <b>100</b>   | <b>100</b>   |              |
| M <sub>n</sub> (g/mol)                       | 1227.6          | 1224.7          | 1252.7       | 1289.44      | 1359.0       | 1707.9       |              |
| Đ <sub>m</sub>                               | 1.18            | 1.17            | 1.14         | 1.14         | 1.14         | 1.11         |              |

Table 3 shows the oligomer compositions with DVA/TEG = 1.5 and 3.

**Table 3.** Kinetics of the DVA-TEG reaction at DVA/TEG = 1.5 and 3.

| <b>DVA/TEG = 1.5</b>                         |               | <b>Composition (%)</b>              |               |             |            |            |          |
|----------------------------------------------|---------------|-------------------------------------|---------------|-------------|------------|------------|----------|
|                                              |               | <b>Time (min)</b>                   |               |             |            |            |          |
|                                              |               | 5.0                                 | 10            | 15          | 20         | 25         | 30       |
| <b>VO</b><br>Vinyl-[TEG] <sub>n</sub> -OH    | V-TEG-OH, n=1 | 0                                   | 0             | 0           | 0          | 0          | 0        |
|                                              | Dimer, n=2    | 0                                   | 0             | 0           | 0          | 0          | 0        |
|                                              | Trimer, n=3   | 1.86                                | 4.71          | 0.88        | -          | -          | -        |
|                                              | Tetramer, n=4 | 0.63                                | 2.23          | 0.29        | -          | -          | -        |
|                                              | Pentamer, n=5 | -                                   | 0.99          | -           | -          | -          | -        |
|                                              | Hexamer, n=6  | -                                   | 0.25          | -           | -          | -          | -        |
|                                              | <b>Total</b>  | <b>2.49</b>                         | <b>8.18</b>   | <b>1.17</b> | <b>0</b>   | <b>0</b>   | <b>0</b> |
| <b>OO</b><br>HO-[TEG] <sub>n</sub> --OH      |               | Not detected                        |               |             |            |            |          |
| <b>VV</b><br>Vinyl-[TEG] <sub>n</sub> -Vinyl | V-TEG-V, n=1  | 0                                   | 0             | 0           | 0          | 0          | 0        |
|                                              | Dimer, n=2    | 46.27                               | 37.47         | 43.73       | 40.65      | 38.26      | 37.59    |
|                                              | Trimer, n=3   | 26.40                               | 24.57         | 26.82       | 23.57      | 23.47      | 27.57    |
|                                              | Tetramer, n=4 | 13.97                               | 12.66         | 14.58       | 15.71      | 14.8       | 14.29    |
|                                              | Pentamer, n=5 | 6.16                                | 4.78          | 5           | 7.65       | 6.99       | 12.55    |
|                                              | Hexamer, n=6  | 3.90                                | 2.39          | 2.61        | 4.08       | 3.68       | 9.70     |
|                                              | Heptamer, n=7 | 2.55                                | 1.41          | 1.25        | 2.55       | 2.21       | 6.49     |
|                                              | Octamer, n=8  | 0.75                                | 0.7           | 0.57        | 1.02       | 1.1        | 2.08     |
|                                              | Nonamer, n=9  | 0.3                                 | 0.28          | 0.23        | 0.51       | 0.37       | 2.4      |
| <b>Total</b>                                 | <b>97.51</b>  | <b>91.818</b>                       | <b>98.822</b> | <b>100</b>  | <b>100</b> | <b>100</b> |          |
| <b>Grand total</b>                           | <b>100</b>    | <b>100</b>                          | <b>100</b>    | <b>100</b>  | <b>100</b> | <b>100</b> |          |
| M <sub>n</sub> (g/mol)                       | 1115.5        | 1210.6                              | 1162.5        | 1240.8      | 1288.6     | 1248.6     |          |
| Đ <sub>m</sub>                               | 1.10          | 1.13                                | 1.12          | 1.15        | 1.17       | 1.14       |          |
| <b>DVA/TEG = 3</b>                           |               | <b>Composition (%) by MALDI-ToF</b> |               |             |            |            |          |
|                                              |               | <b>Time (min)</b>                   |               |             |            |            |          |
|                                              |               | 5                                   | 10            | 15          | 20         | 25         | 30       |
| <b>VO</b><br>Vinyl-[TEG] <sub>n</sub> -OH    |               | Not detected                        |               |             |            |            |          |
| <b>OO</b><br>HO-[TEG] <sub>n</sub> --OH      |               | Not detected                        |               |             |            |            |          |
| <b>VV</b><br>Vinyl-[TEG] <sub>n</sub> -Vinyl | V-TEG-V, n=1  | 42.86                               | 51.47         | 49.5        | 44.19      | 42.6       | 38.61    |
|                                              | Dimer, n=2    | 27.27                               | 28.30         | 29.1        | 31.29      | 29.56      | 28.30    |
|                                              | Trimer, n=3   | 18.51                               | 13.97         | 14.04       | 17.10      | 17.97      | 18.89    |
|                                              | Pentamer, n=5 | 8.1                                 | 5.15          | 5.69        | 6.13       | 7.54       | 9.17     |
|                                              | Hexamer, n=6  | 2.60                                | 1.10          | 1.34        | 1.29       | 2.03       | 3.33     |
|                                              | Heptamer      | 0.65                                | -             | 0.33        | -          | 0.29       | 0.83     |
| <b>Total</b>                                 | <b>100</b>    | <b>100</b>                          | <b>100</b>    | <b>100</b>  | <b>100</b> | <b>100</b> |          |
| M <sub>n</sub> (g/mol)                       | 723.01        | 679.12                              | 692.16        | 703.9       | 712.69     | 738.07     |          |
| Đ <sub>m</sub>                               | 1.23          | 1.17                                | 1.19          | 1.18        | 1.21       | 1.24       |          |
